# Supplementary material for: Degradation of Tryptophan by UV Irradiation: Influencing Parameters and Mechanisms
Source: MDPI journal article supplement (doi:10.3390/w13172368), 2021-08-28
Supplement: s1 [file s1]

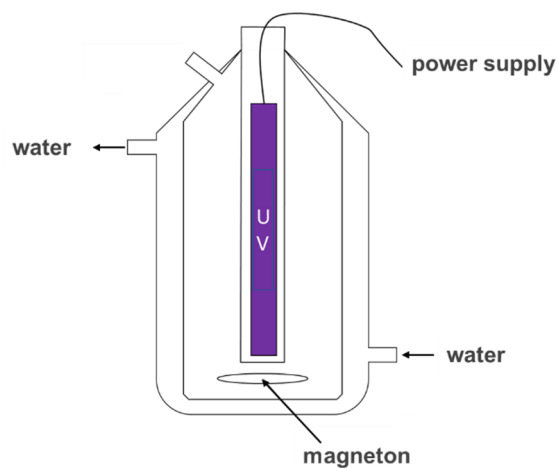

**Figure S1.** Experimental reactor

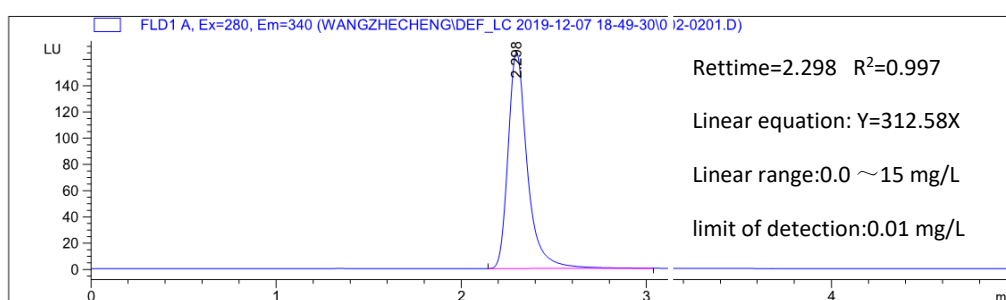

**Figure S2.** HPLC graph of Trp

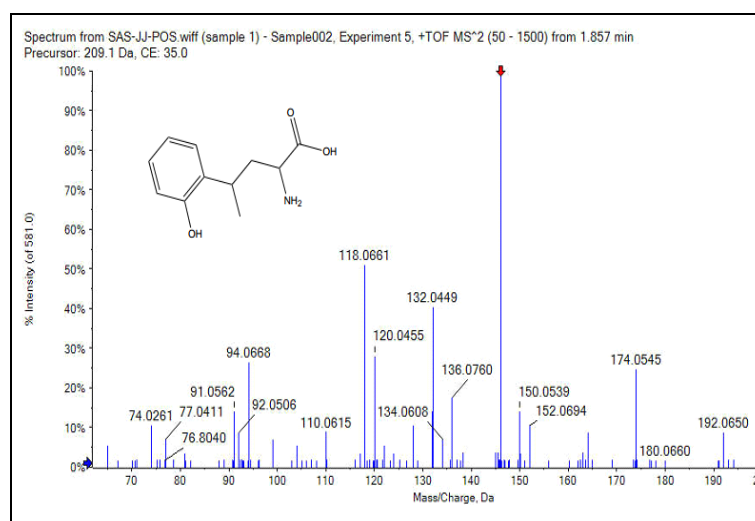

**Figure S3.** Secondary mass spectrometry of  $C_{11}H_{15}NO_3$

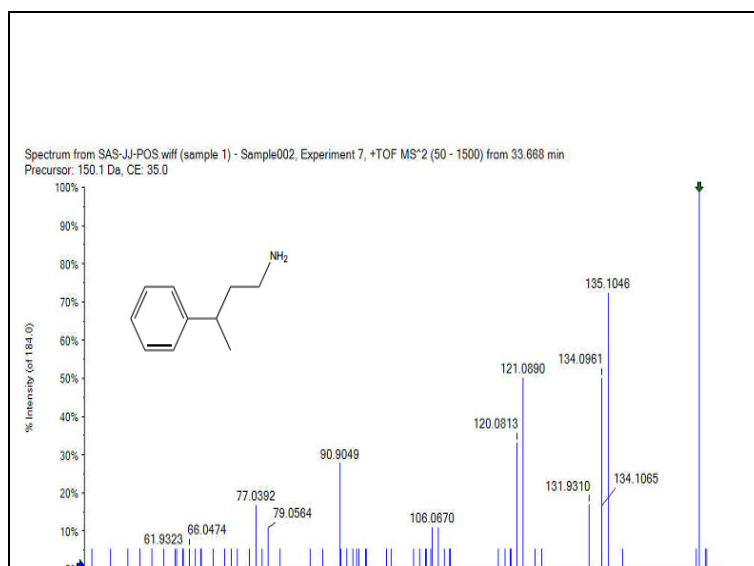

**Figure S4.** Secondary mass spectrometry of C<sub>10</sub>H<sub>15</sub>N

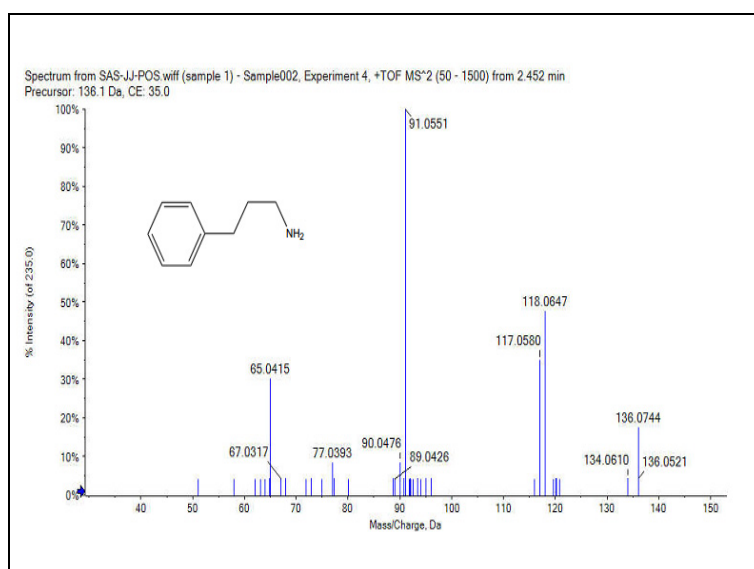

**Figure S5.** Secondary mass spectrometry of C<sub>9</sub>H<sub>13</sub>N

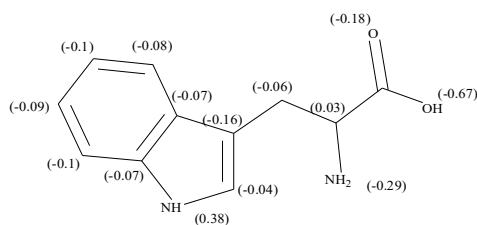

**Figure S6.** the atom potential map of Trp
