# Supplementary material for: Degradation of Tryptophan by UV Irradiation: Influencing Parameters and Mechanisms
Source: MDPI journal article supplement (doi:10.3390/w13172368), 2021-08-28
Supplement: s1 [file s1]

Archive with 1 entries (1 files):
- water-1330000-supplementary.pdf
